# Supplementary material
Source: Springer Nature journal article supplement (https://www.springermedizin.de/resource/supplementary/13075_2013_4427_MOESM4_ESM.pdf/10110384)

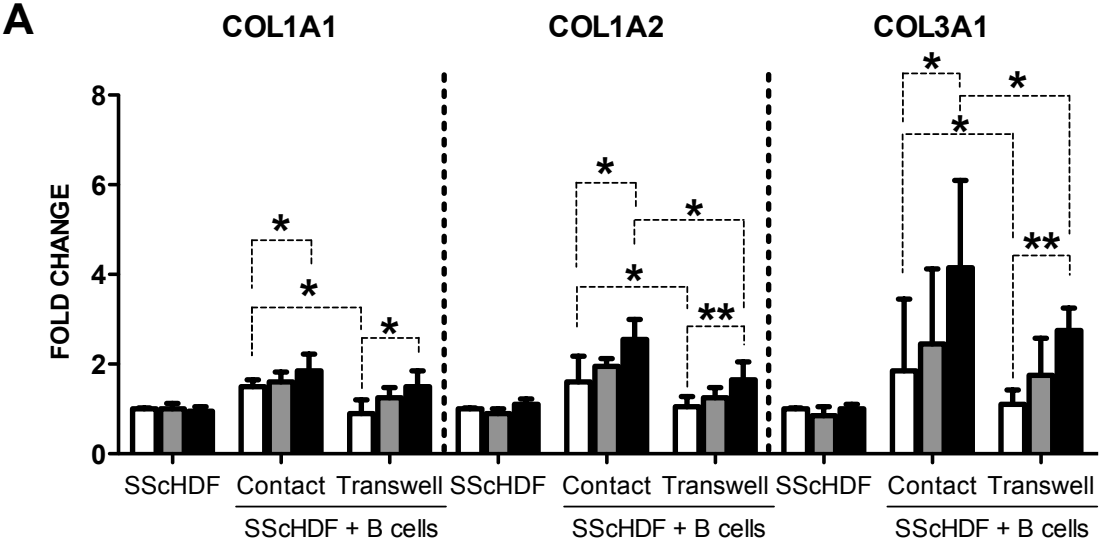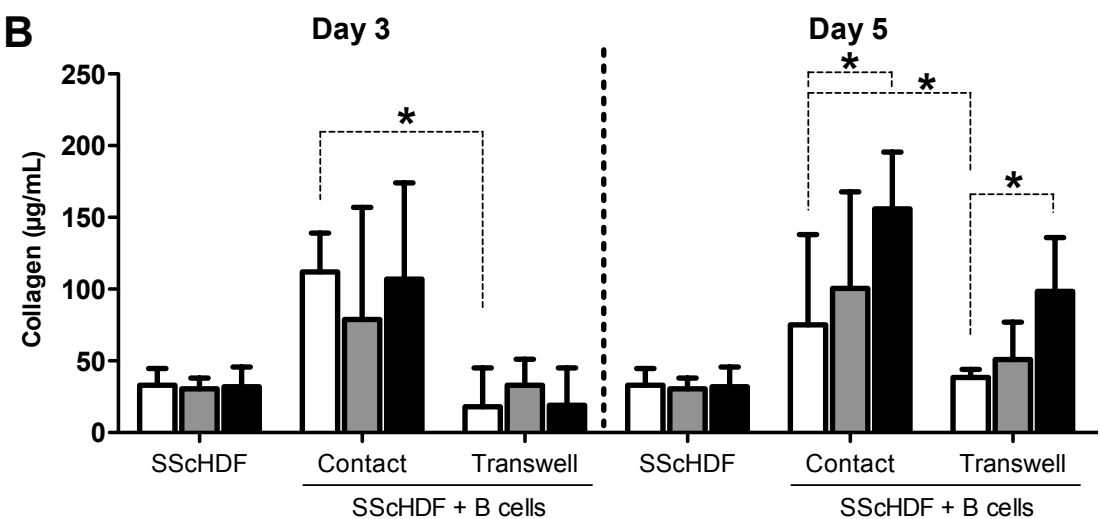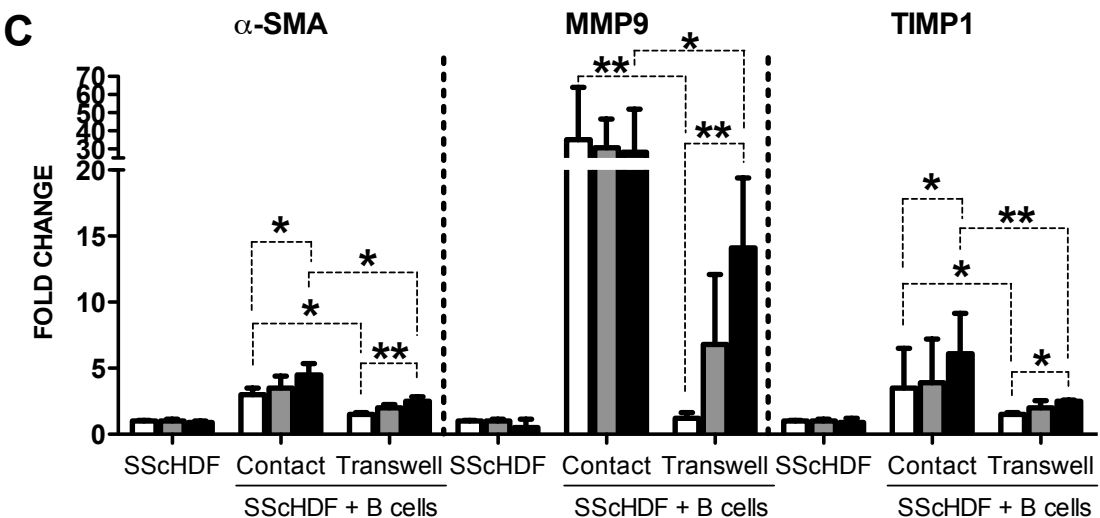

Medium  
  $\mu$ -chain Ab  
  $\mu$  + rhBAFF

Supplement: MOESM4 [file 10110384]
